# Supplementary material
Source: PubMed Central journal article supplement (PMC549351)
Supplement: molcellb_25_5_2031__1.pdf [file molcellb_25_5_2031__1.pdf]

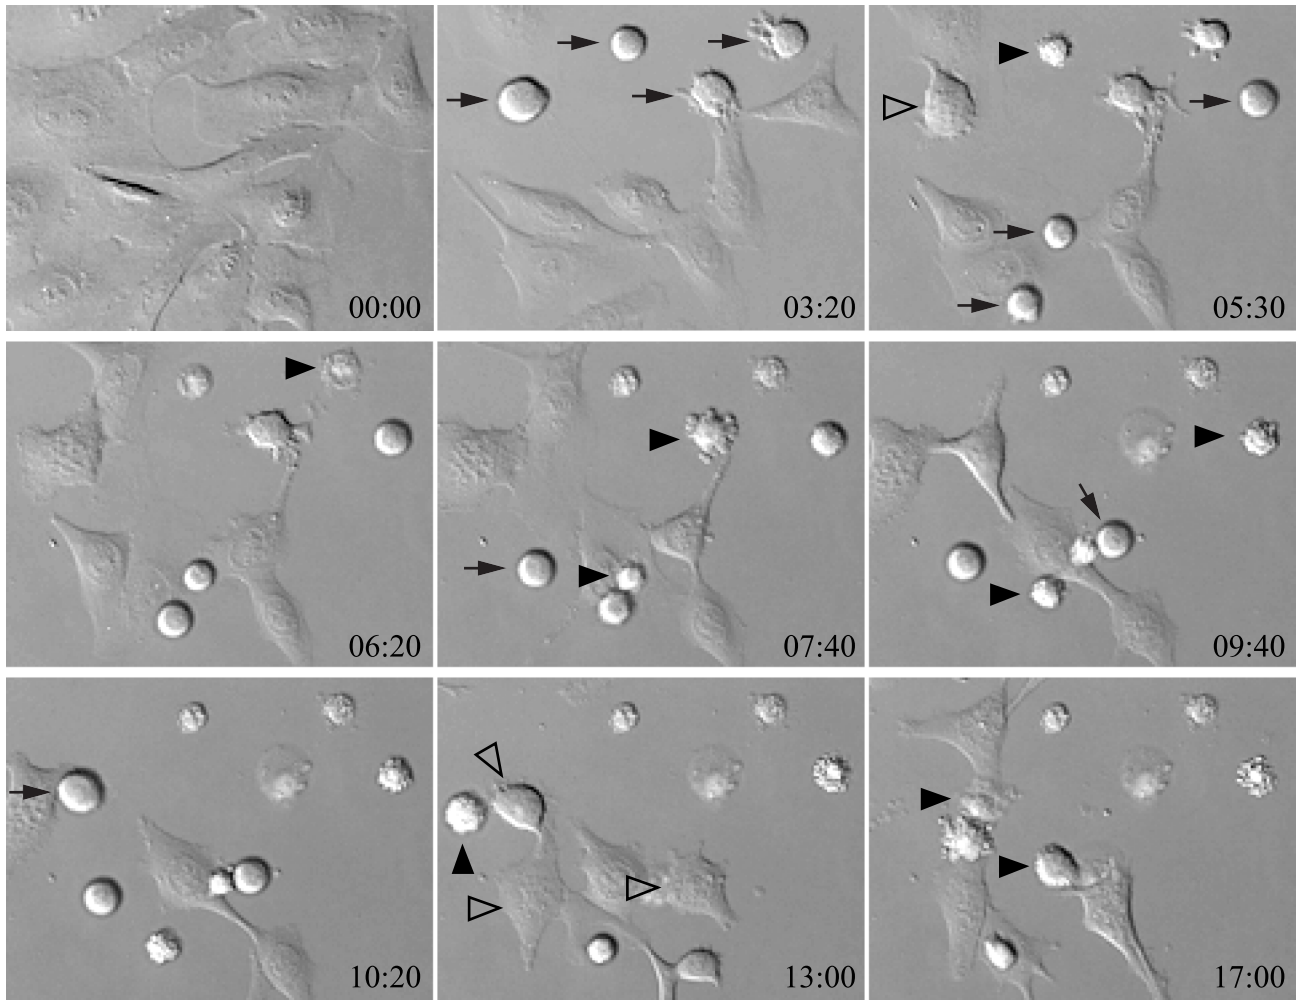

Supplementary Fig. S1. Expression of Plk1-S137D/T210D induces mitotic catastrophe. Plk1-S137D/T210D cells were released from a double thymidine block with expression induced at release. Cells were followed using time-lapse imaging. Mitotic cells (arrows), cytokinesis defects (open arrowheads) and mitotic catastrophe (filled arrowheads) are indicated. Numbers in the lower right corner represent elapsed time (hrs:min).
