# Supplementary material
Source: PubMed Central journal article supplement (PMC549351)
Supplement: molcellb_25_5_2031__2.pdf [file molcellb_25_5_2031__2.pdf]

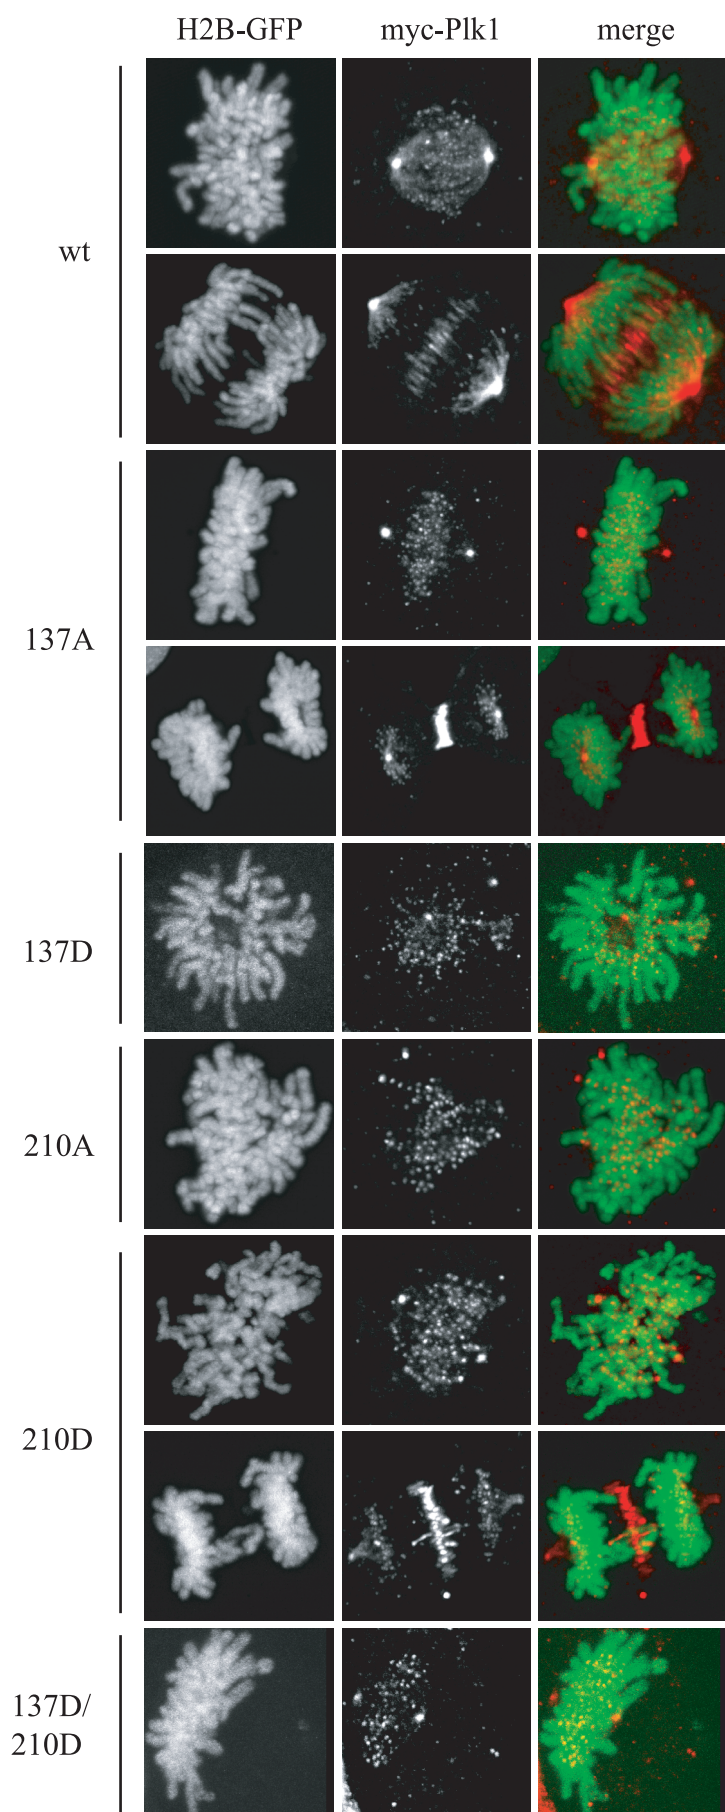

Supplementary Fig. S2. Subcellular localization of Plk1 (mutants). Cells grown on coverslips were transiently transfected with the indicated Plk1 (mutant) plasmids together with H2B-GFP, fixed 15 hrs after thymidine release and stained with  $\alpha$ -myc to determine Plk1 localization.
